# Supplementary figures and images for: Targeted cell elimination reveals an auxin-guided biphasic mode of lateral root initiation
Source: PubMed Central journal article supplement — Genes Dev. 2016 Feb 15;30(4):471–83. doi: 10.1101/gad.276964.115 (PMC4762431; doi:10.1101/gad.276964.115), 2016-02-15

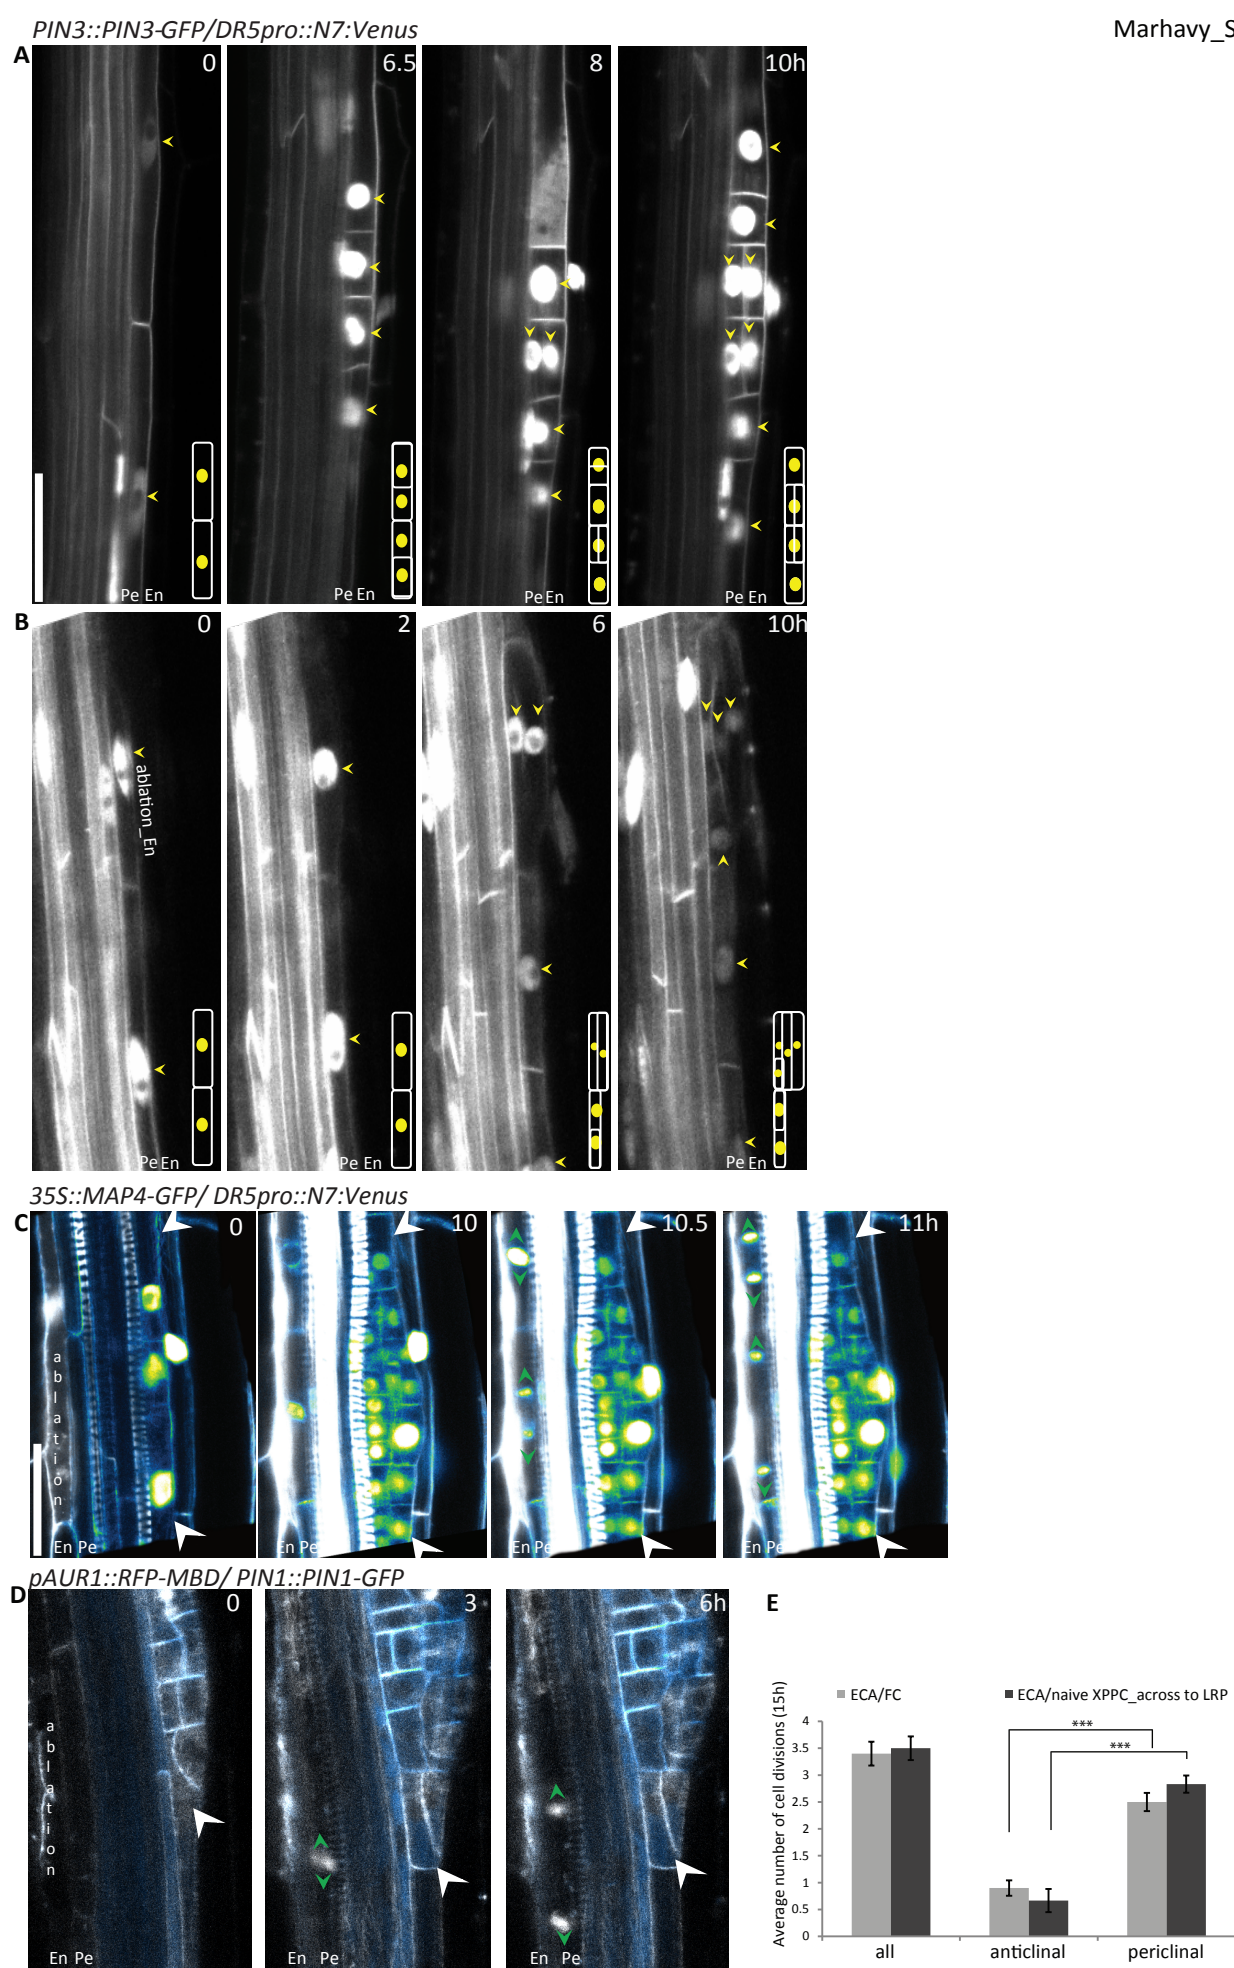

Supplement: supp_30.4.471_Figure_S1.pdf [file supp_30.4.471_Figure_S1.pdf]

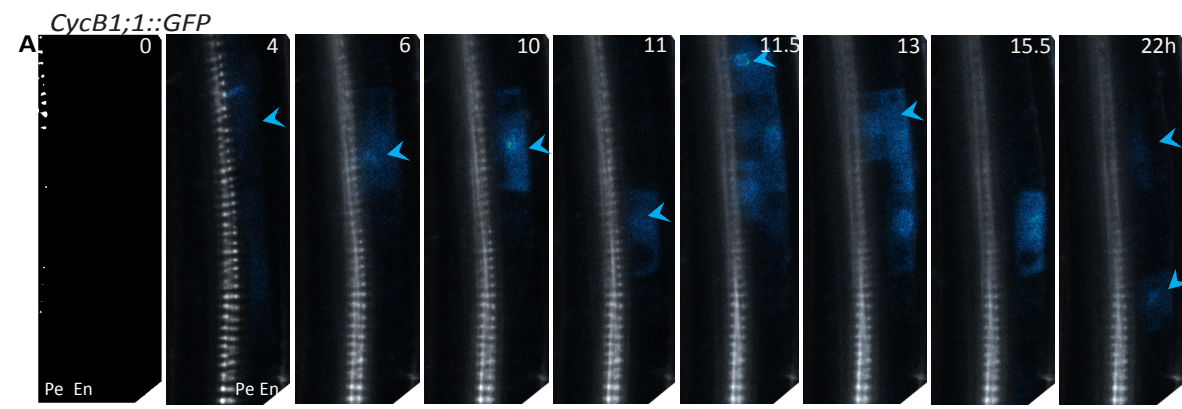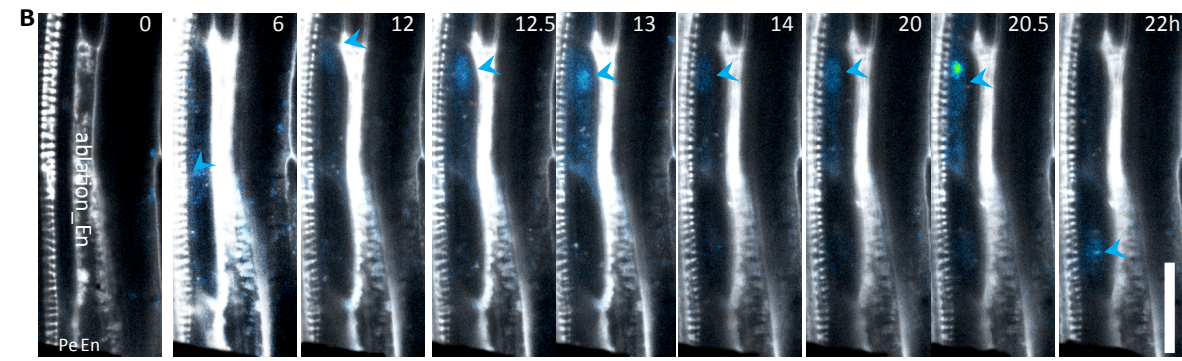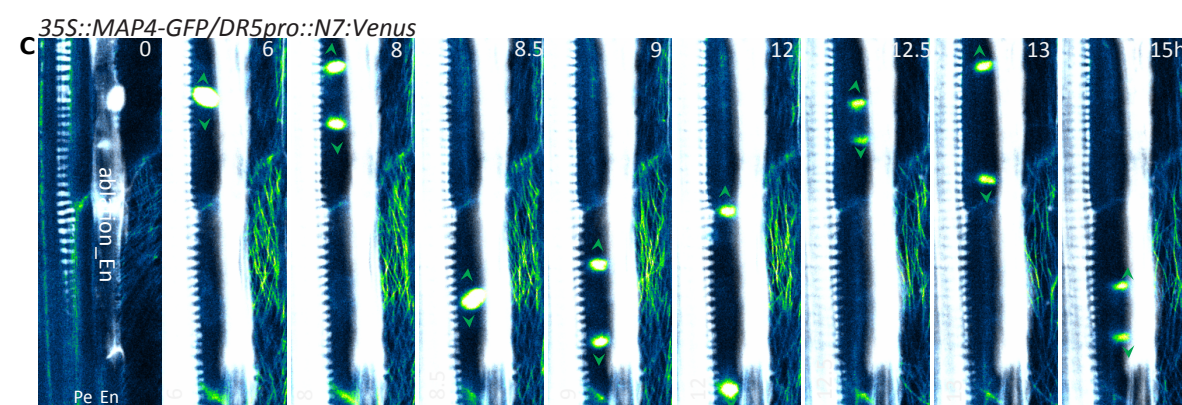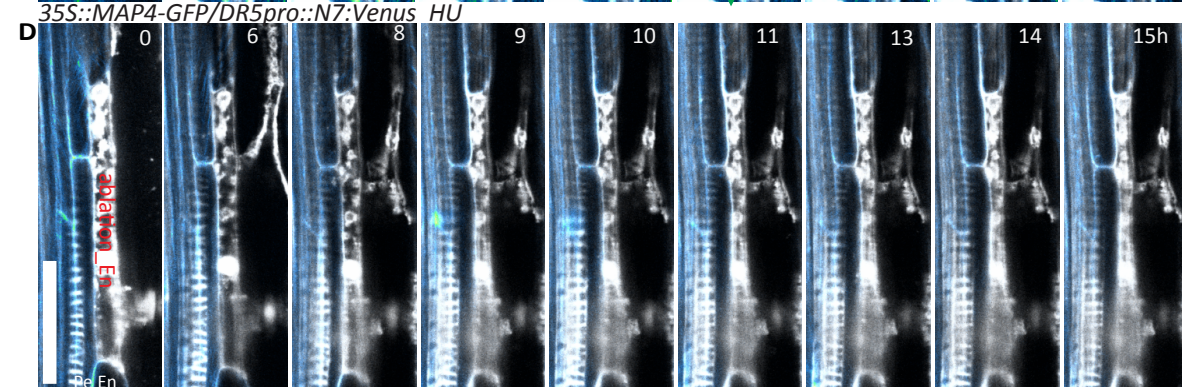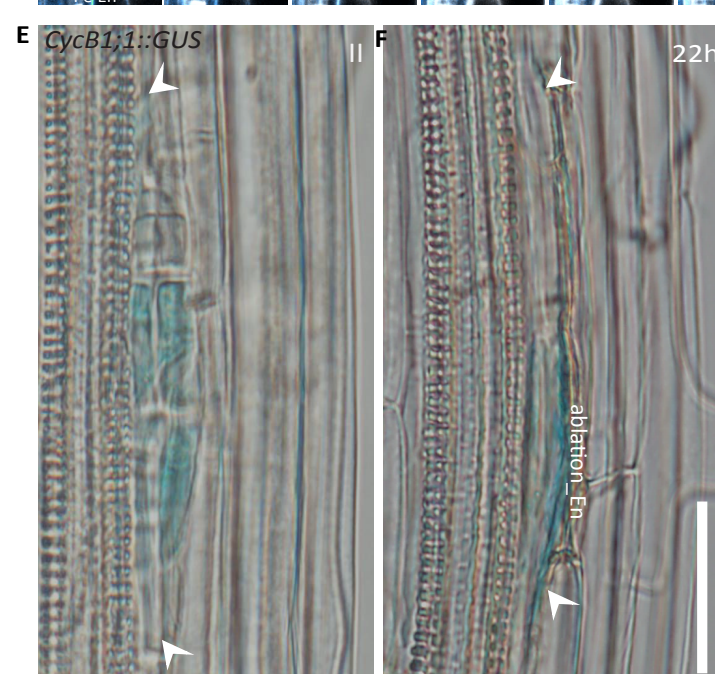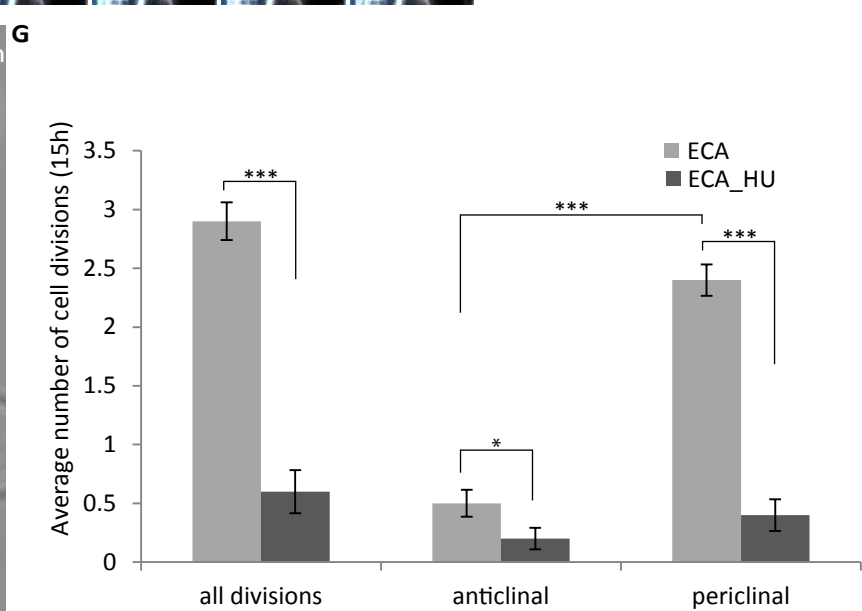

Supplement: supp_30.4.471_Figure_S3.pdf [file supp_30.4.471_Figure_S3.pdf]

*SCR::SCR-YFP*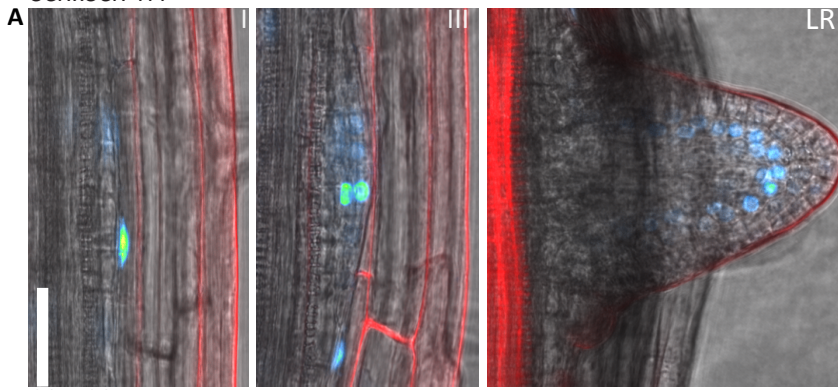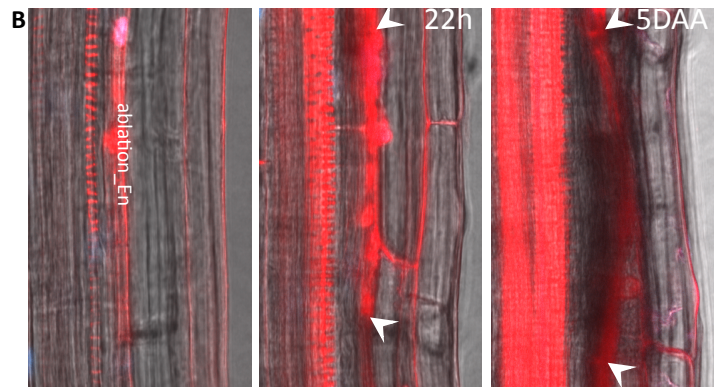*SCR::SCR-YFP NAA*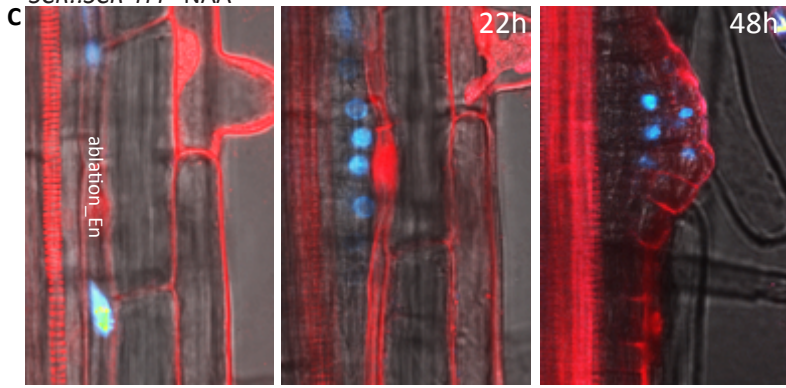*J1103 >> CFP*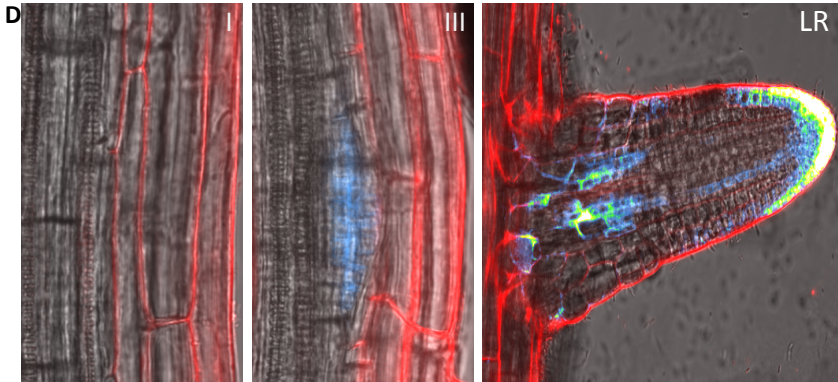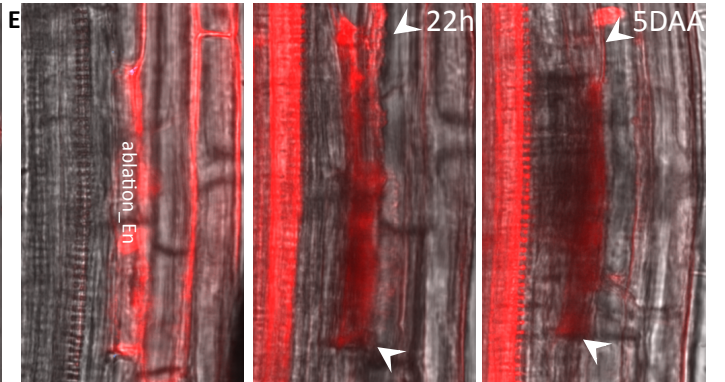*J1103 >> CFP NAA*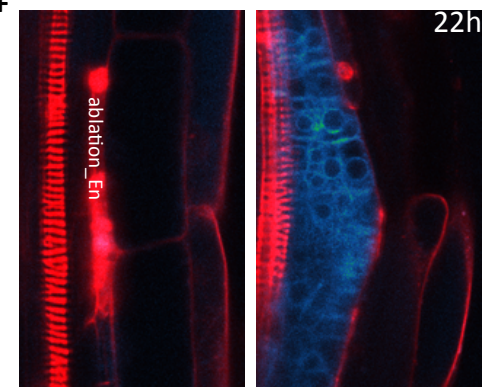

Supplement: supp_30.4.471_Figure_S4.pdf [file supp_30.4.471_Figure_S4.pdf]

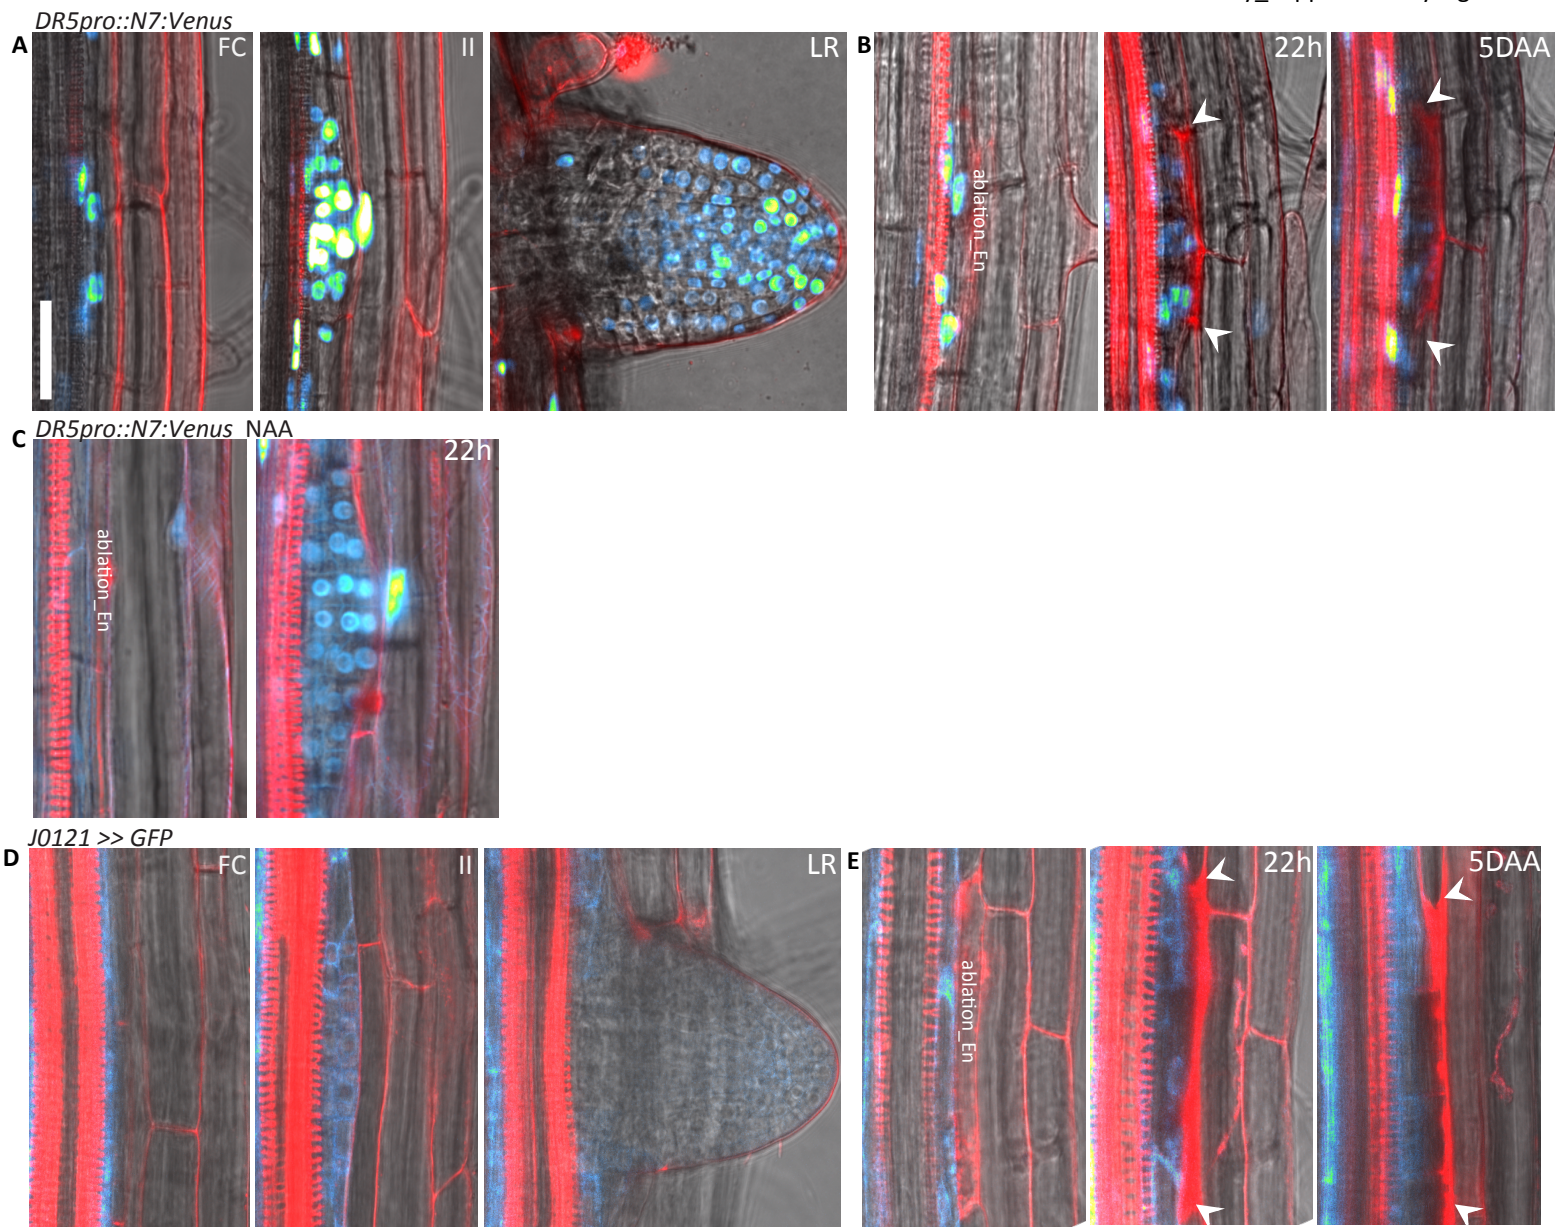

Supplement: supp_30.4.471_Figure_S5.pdf [file supp_30.4.471_Figure_S5.pdf]

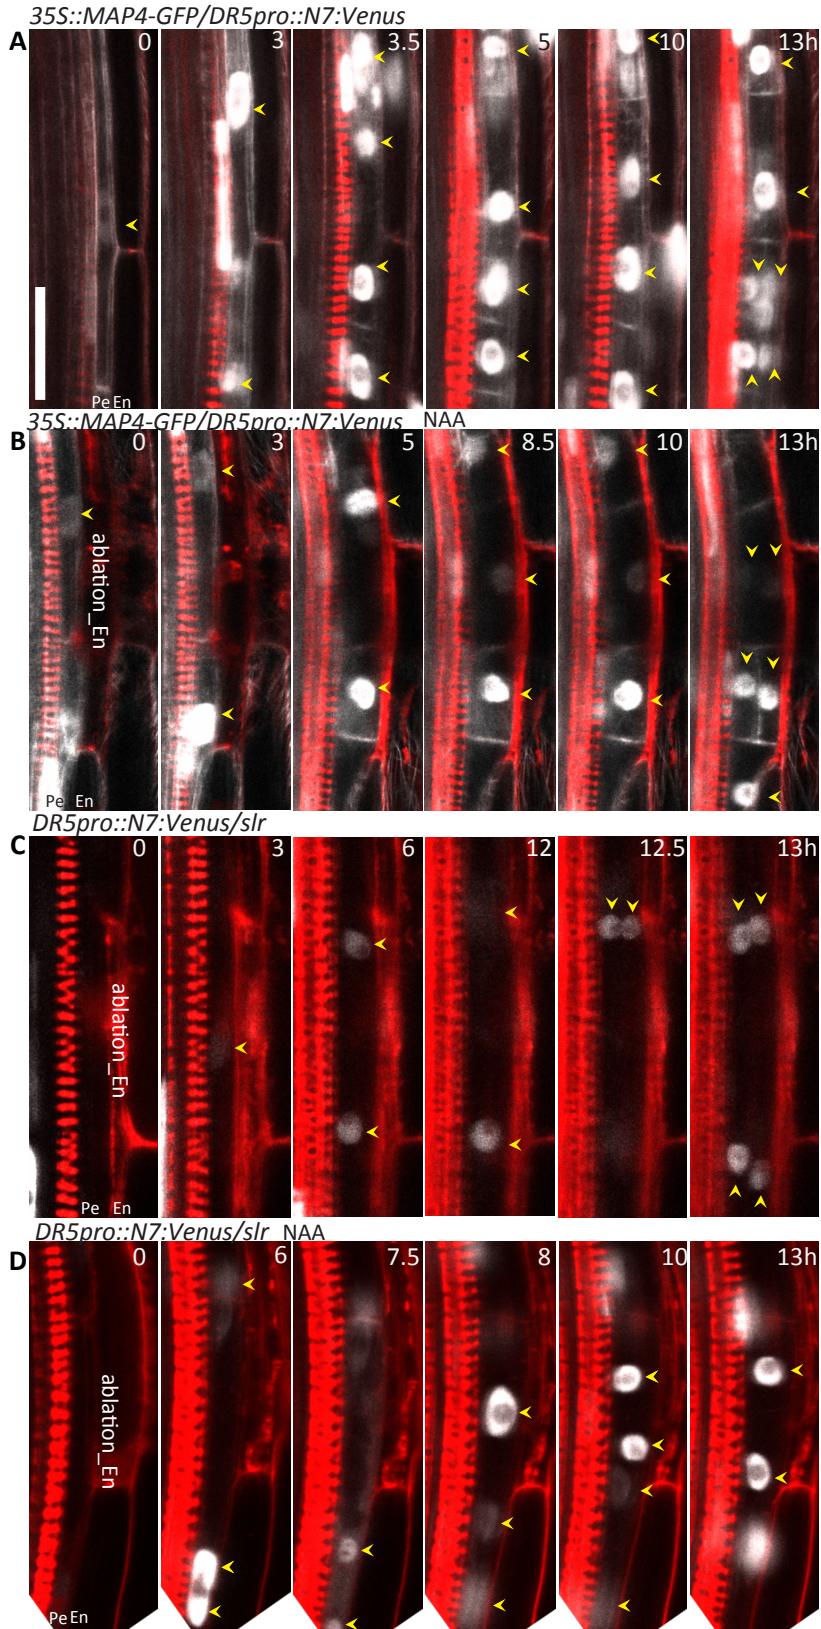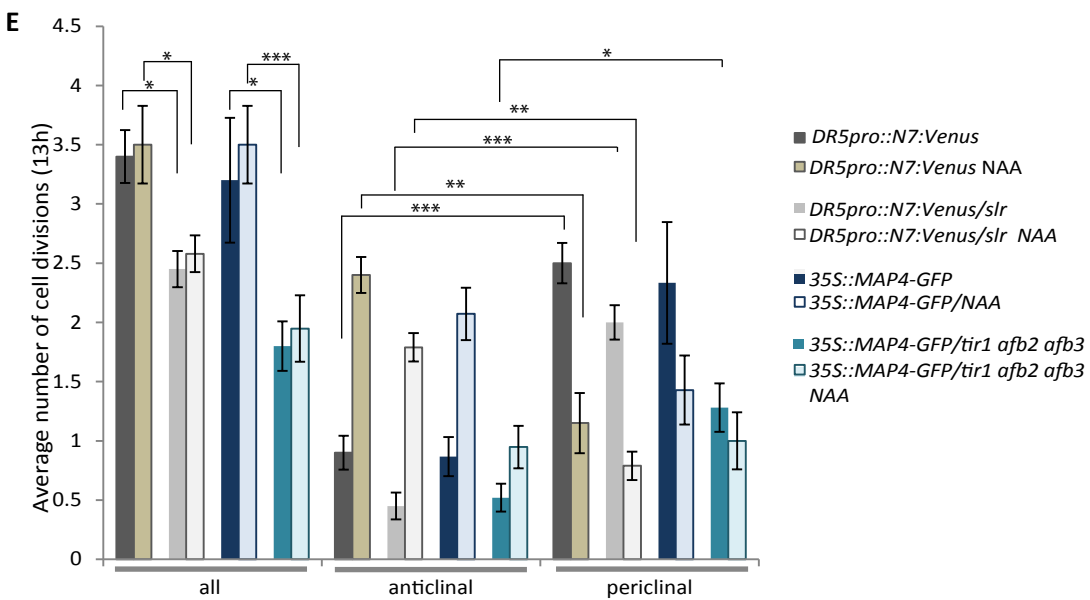

Supplement: supp_30.4.471_Figure_S7.pdf [file supp_30.4.471_Figure_S7.pdf]
